# Supplementary material for: Development and Characterization of 3D Printed Multifunctional Bioscaffolds Based on PLA/PCL/HAp/BaTiO3 Composites
Source: MDPI journal article supplement (doi:10.3390/app11094253), 2021-05-07
Supplement: s1 [file s1]

## Supplementary Material

### Development and characterization of 3D printed multifunctional bioscaffolds based on PLA/PCL/HAp/BaTiO<sub>3</sub> composites

Emmanouela Mystiridou<sup>1,2</sup>, Anastasios C. Patsidis<sup>1,2</sup> and Nikolaos Bouropoulos<sup>1,2,\*</sup>

<sup>1</sup> Department of Materials Science, University of Patras, Patras

<sup>2</sup> Foundation for Research and Technology Hellas, Institute of Chemical Engineering and High Temperature Chemical Processes, Patras, Greece

\* Correspondence: nbouro@upatras.gr

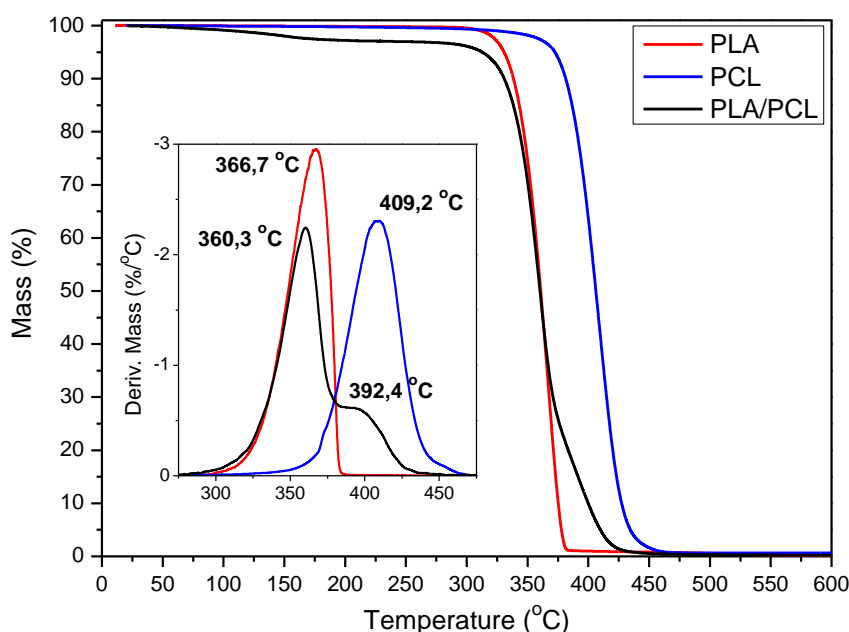

**Figure S1:** TGA and DTGA (insert) graphs of neat PLA and PCL pellets and PLA/PCL filaments.

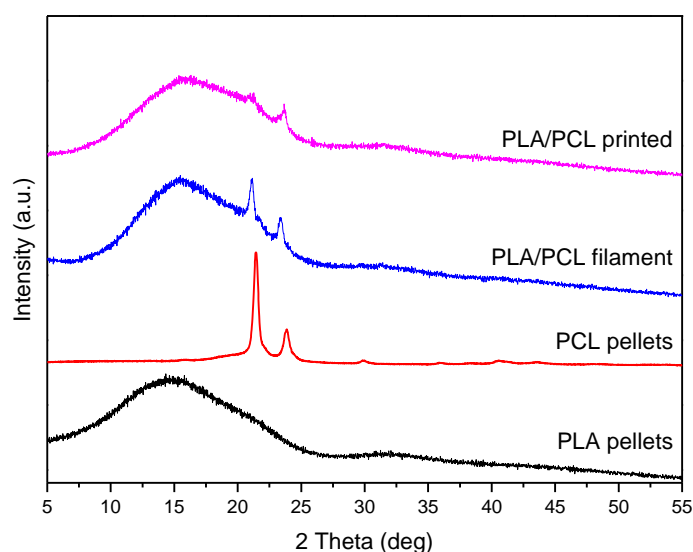

**Figure S2:** XRD graphs of raw polymers and pure polymeric filaments and 3D constructs.
